# Supplementary material for: Preparation of anthracene-based tetraperimidine hexafluorophosphate and selective recognition of chromium(III) ions
Source: publisher site journal article supplement (doi:10.3762/bjoc.15.278), 2019-11-25
Supplement: Additional file 1 [file 1860-5397-15-278-S1.pdf]

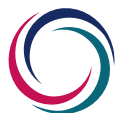

## Supporting Information

for

### **Preparation of anthracene-based tetraaperimidine hexafluorophosphate and selective recognition of chromium(III) ions**

Qing-Xiang Liu, Feng Yang, Zhi-Xiang Zhao, Shao-Cong Yu and Yue Ding

*Beilstein J. Org. Chem.* **2019**, *15*, 2847–2855. doi:10.3762/bjoc.15.278

**Supporting crystallographic data, fluorescence, UV, HRMS, and IR spectra of 3 and 3·Cr<sup>3+</sup>, general considerations, characterization data, and copies of the <sup>1</sup>H and <sup>13</sup>C NMR spectra of all compounds**

## Table of contents

1. CCDC numbers for compound **3**.
2. Crystal data and structure refinements for **3** (Table S1).
3. Crystal packing of compound **3** (Figure S1(a) and Figure S1(b)).
4. Fluorescence and UV–vis spectroscopy for compound **3** (Figures S2–S9).
5. Figure S10  $\pi_{13}^{15}$  bond of perimidine.
6. Figure of HRMS for **3**·Cr<sup>3+</sup> (Figure S11).
7. Infrared spectra of **3** and **3**·Cr<sup>3+</sup> (Figure S12).
8. Figure of HRMS for **3** (Figure S13).
9. <sup>1</sup>H NMR and <sup>13</sup>C NMR spectra of intermediate and compound **3** (Figures S14–S22).

## 1. CCDC number for compound 3.

CCDC 1918752 contains the supplementary crystallographic data for compound 3. The data can be obtained free of charge via <http://www.ccdc.cam.ac.uk/conts/retrieving.html>, or from the Cambridge Crystallographic Data Centre, 12 Union Road, Cambridge, CB2 1EZ, UK; fax: (+44) 223-336-033; or e-mail: [deposit@ccdc.cam.ac.uk](mailto:deposit@ccdc.cam.ac.uk).

## 2. Crystal data and structure refinements for 3

**Table S1:** Crystal data and structure refinements for 3

|                                 |                                             |                                                     |                                |
|---------------------------------|---------------------------------------------|-----------------------------------------------------|--------------------------------|
| Chemical formula                | $C_{76}H_{76}N_{10}P_4F_{24} \cdot 4CH_3CN$ | $F(000)$                                            | 968                            |
| Formula weight                  | 1875.57                                     | Cryst size, mm                                      | $0.25 \times 0.15 \times 0.14$ |
| Cryst syst                      | Triclinic                                   | $\theta_{min}, \theta_{max}$ , deg                  | 3.74, 67.06                    |
| Space group                     | $P\bar{1}$                                  | $T/K$                                               | 172.9(1)                       |
| $a/\text{\AA}$                  | 11.850(5)                                   | No. of data collected                               | 14087                          |
| $b/\text{\AA}$                  | 12.401(6)                                   | No. of unique data                                  | 7439                           |
| $c/\text{\AA}$                  | 14.951(5)                                   | No. of refined params                               | 579                            |
| $\alpha/\text{deg}$             | 92.4(1)                                     | Goodness-of-fit on $F^2$ <sup>a</sup>               | 1.048                          |
| $\beta/\text{deg}$              | 94.3(1)                                     | Final $R$ indices <sup>b</sup> [ $I > 2\sigma(I)$ ] |                                |
| $\gamma/\text{deg}$             | 107.3(4)                                    | $R_1$                                               | 0.0754                         |
| $V/\text{\AA}^3$                | 2086.65(1)                                  | $wR_2$                                              | 0.1986                         |
| $Z$                             | 1                                           | $R$ indices (all data)                              |                                |
| $D_{calcd}$ , Mg/m <sup>3</sup> | 1.493                                       | $R_1$                                               | 0.1117                         |
| Abs coeff, mm <sup>-1</sup>     | 1.797                                       | $wR_2$                                              | 0.2238                         |

<sup>a</sup>  $GOF = [\sum \omega(F_o^2 - F_c^2)^2 / (n - p)]^{1/2}$ , where  $n$  is the number of reflection and  $p$  is the number of parameters refined. <sup>b</sup>  $R_1 = \Sigma(|F_o| - |F_c|) / \Sigma|F_o|$ ;  $wR_2 = [\Sigma[w(F_o^2 - F_c^2)^2] / \Sigma w(F_o^2)^2]^{1/2}$ .

### 3. Crystal packing of compound 3

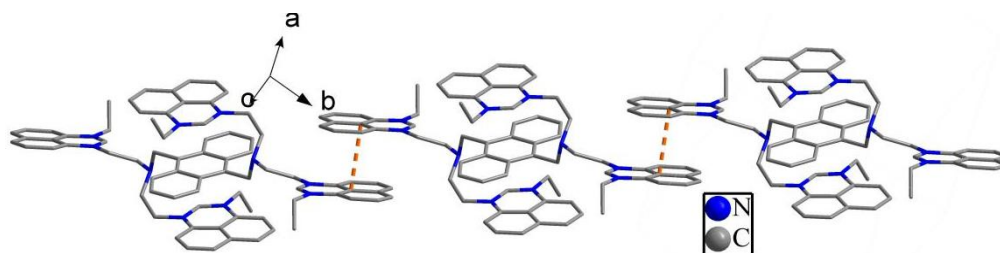

**Figure S1(a):** 1D supermolecular chain of **3**.

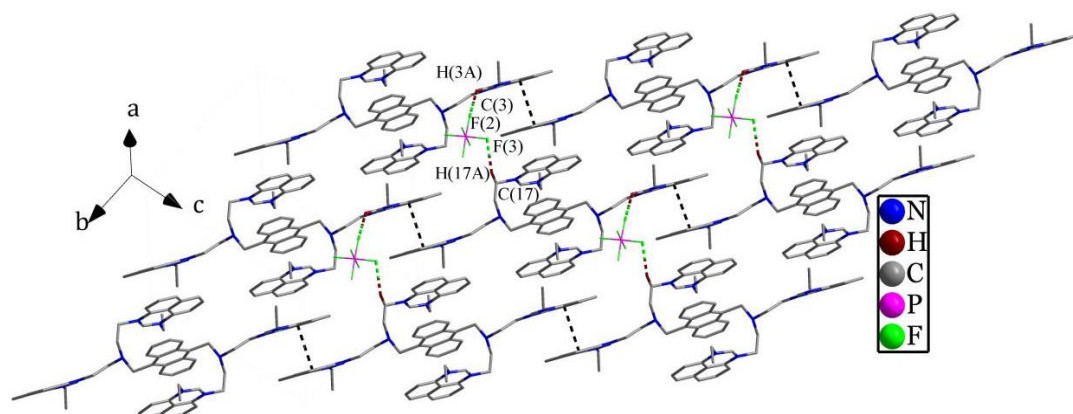

**Figure S1(b):** 2D supermolecular layer of **3**.

### 4. Fluorescence and UV-vis spectroscopy for compound 3

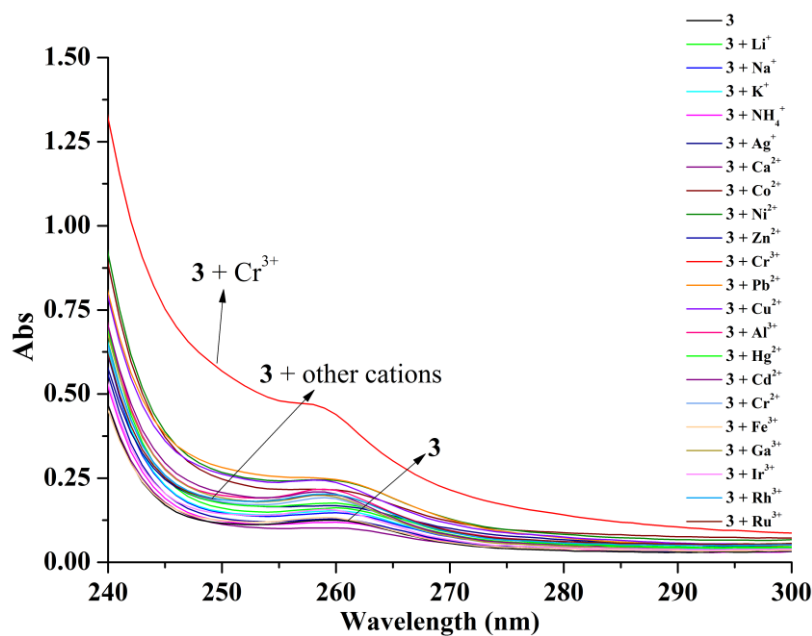

**Figure S2:** UV-vis absorption change of **3** ( $5.0 \times 10^{-6}$  mol/L) upon the addition of the nitrate salts of  $\text{K}^+$ ,  $\text{Na}^+$ ,  $\text{Li}^+$ ,  $\text{Ag}^+$ ,  $\text{NH}_4^+$ ,  $\text{Zn}^{2+}$ ,  $\text{Cd}^{2+}$ ,  $\text{Ca}^{2+}$ ,  $\text{Ni}^{2+}$ ,  $\text{Pb}^{2+}$ ,  $\text{Cu}^{2+}$ ,  $\text{Co}^{2+}$ ,  $\text{Al}^{3+}$ ,  $\text{Cr}^{3+}$ ,  $\text{Hg}^+$ ,  $\text{Hg}^{2+}$ ,  $\text{Rh}^{3+}$ ,  $\text{Ir}^{3+}$ ,  $\text{Cr}^{2+}$ ,  $\text{Ga}^{3+}$ ,  $\text{Ru}^{3+}$  and  $\text{Fe}^{3+}$  ( $5 \times 10^{-5}$  mol/L) in acetonitrile at 25 °C.

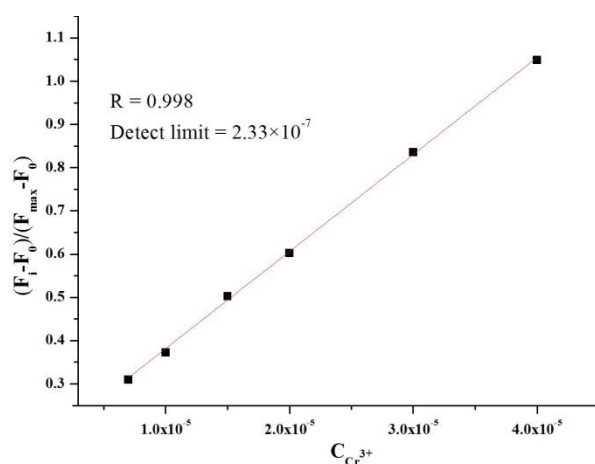

**Figure S3:** Emission (at 423 nm) of **3** at different concentrations of  $\text{Cr}^{3+}$  ( $0.7, 1.0, 1.5, 2.0, 3.0, 4.0 \times 10^{-5}$  mol/L) added, normalized between the minimum emission ( $0.0 \text{ M Cr}^{3+}$ ) and the emission  $4.0 \times 10^{-5}$  mol/L  $\text{Cr}^{3+}$ . The detection limit was determined to be  $2.33 \times 10^{-7}$  mol/L.

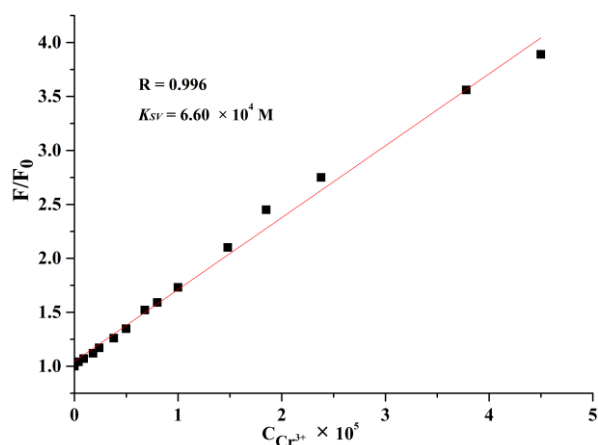

**Figure S4:** Stern–Volmer plot of **3** ( $5.0 \times 10^{-6}$  mol/L) in the presence of  $\text{Cr}^{3+}$  in  $\text{CH}_3\text{CN}/\text{DMSO}$  9:1 (v:v) at  $25^\circ\text{C}$ , and the linear range is from  $0.0$ – $4.5 \times 10^{-5}$  mol/L.

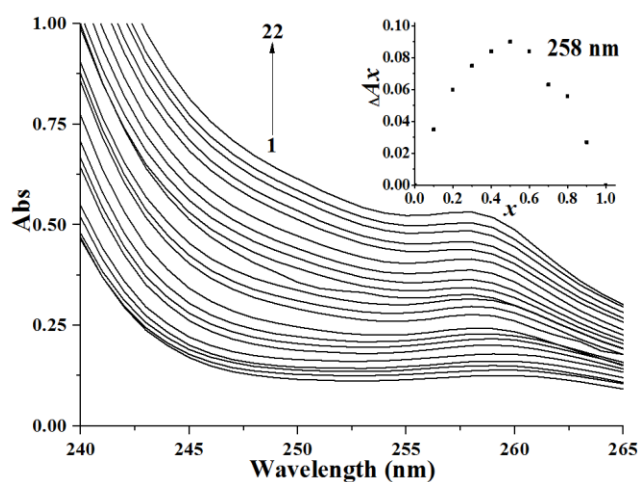

**Figure S5:** The UV–vis absorption spectra of **3** ( $5.0 \times 10^{-6}$  mol/L) in  $\text{CH}_3\text{CN}/\text{DMSO}$

9:1 (v/v) at 25 °C.  $C_{Cr^{3+}}$  for curves 1–22 are 0, 0.02, 0.06, 0.1, 0.2, 0.4, 0.6, 0.8, 1.2, 1.4, 1.6, 1.8, 2.0, 2.2, 2.4, 2.6, 2.8, 3.0, 3.2, 3.4, 3.5 and  $3.6 \times 10^{-5}$ . Inset: the Job's plot for  $3 \cdot Cr^{3+}$  complex in  $CH_3CN/DMSO$  9:1 (v/v) at 258 nm.

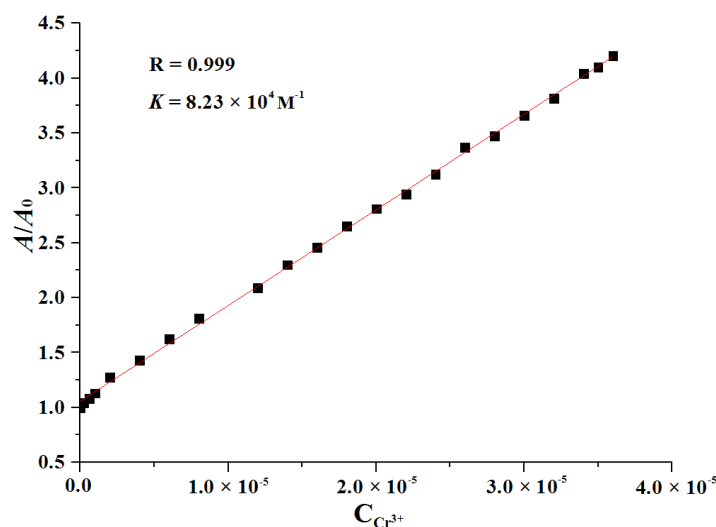

**Figure S6:** Benesi–Hildebrand plot of **3** ( $5.0 \times 10^{-6}$  mol/L) at 258 nm in the presence of  $Cr^{3+}$  in  $CH_3CN/DMSO$  9:1 (v/v) at 25 °C.

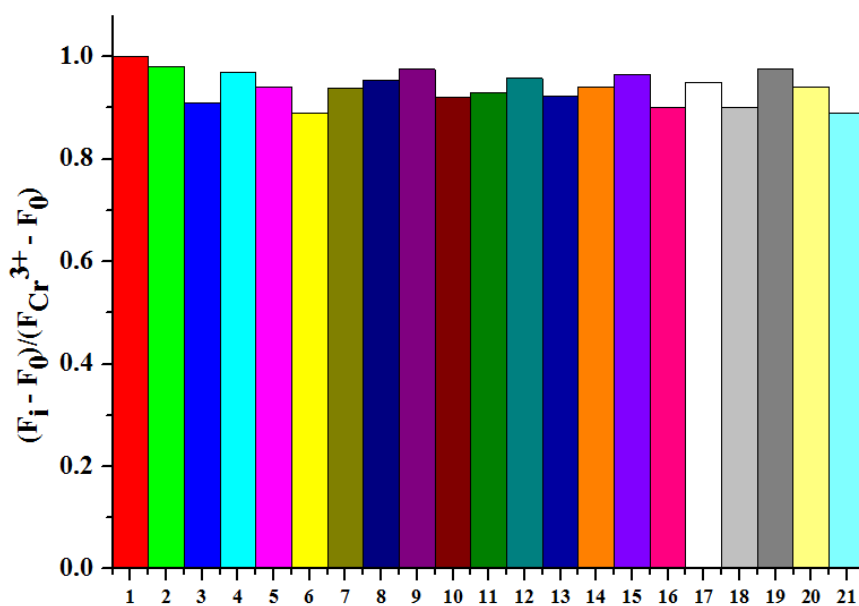

**Figure S7:** Change ratio  $((F_i - F_0)/(F_{Cr^{3+}} - F_0))$  of fluorescence intensity of **3** ( $5.0 \times 10^{-6}$  mol/L) at 423 nm upon the addition of 30 equiv  $Cr^{3+}$  in the presence of 30 equiv background cations. 1:  $Cr^{3+}$ ; 2:  $Cr^{3+} + Li^+$ ; 3:  $Cr^{3+} + Na^+$ ; 4:  $Cr^{3+} + K^+$ ; 5:  $Cr^{3+} + NH_4^+$ ; 6:  $Cr^{3+} + Ag^+$ ; 7:  $Cr^{3+} + Ca^{2+}$ ; 8:  $Cr^{3+} + Co^{2+}$ ; 9:  $Cr^{3+} + Ni^{2+}$ ; 10:  $Cr^{3+} + Zn^{2+}$ ; 11:  $Cr^{3+} + Cu^{2+}$ ; 12:  $Cr^{3+} + Cd^{2+}$ ; 13:  $Cr^{3+} + Pb^{2+}$ ; 14:  $Cr^{3+} + Hg^{2+}$ ; 15:  $Cr^{3+} + Al^{3+}$ ; 16:  $Cr^{3+} +$

$\text{Rh}^{3+}$ ; 17:  $\text{Cr}^{3+} + \text{Ir}^{3+}$ ; 18:  $\text{Cr}^{3+} + \text{Cr}^{2+}$ ; 19:  $\text{Cr}^{3+} + \text{Ga}^{3+}$ ; 20:  $\text{Cr}^{3+} + \text{Ru}^{3+}$ ; 21:  $\text{Cr}^{3+} + \text{Fe}^{3+}$   
in  $\text{CH}_3\text{CN}/\text{DMSO}$  9:1 (v/v) at 25 °C.

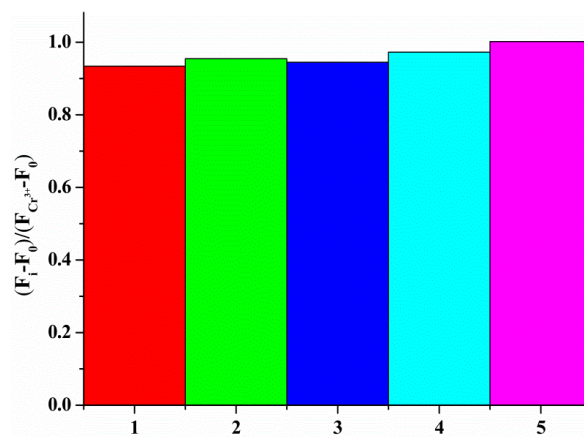

**Figure S8:** Fluorescence intensity of **3** ( $5.0 \times 10^{-6}$  mol/L) in various mixtures of different  $\text{Cr}^{3+}$  salts (1:  $\text{CrCl}_3$ , 2:  $\text{CrBr}_3$ , 3:  $\text{Cr}_2(\text{SO}_4)_3$ , 4:  $\text{Cr}(\text{OAc})_3$ , 5:  $\text{Cr}(\text{NO}_3)_3$ ;  $3.0 \times 10^{-6}$  mol/L) in  $\text{CH}_3\text{CN}/\text{DMSO}$  9:1 (v/v) at 25 °C.

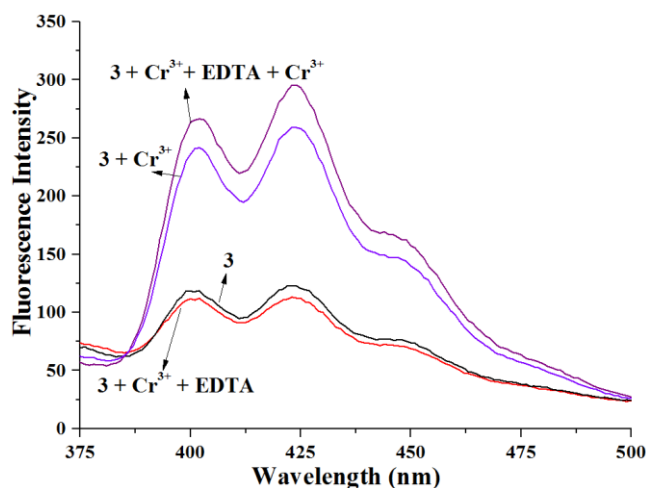

**Figure S9:** Fluorescence reversibility of **3** upon the detection of  $\text{Cr}^{3+}$ . Fluorescent changes of **3** after the addition of  $\text{Cr}^{3+}$ , EDTA,  $\text{Cr}^{3+}$  in that order in  $\text{CH}_3\text{CN}/\text{DMSO}$  9:1 (v/v) at 25 °C.

## 5. The Figure S10 $\pi_{13}^{15}$ bond of perimidine

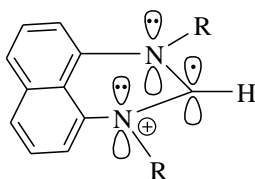

**Figure S10:**  $\pi_{13}^{15}$  bond of perimidine.

## 6. Figure of HRMS for $3 \cdot \text{Cr}^{3+}$

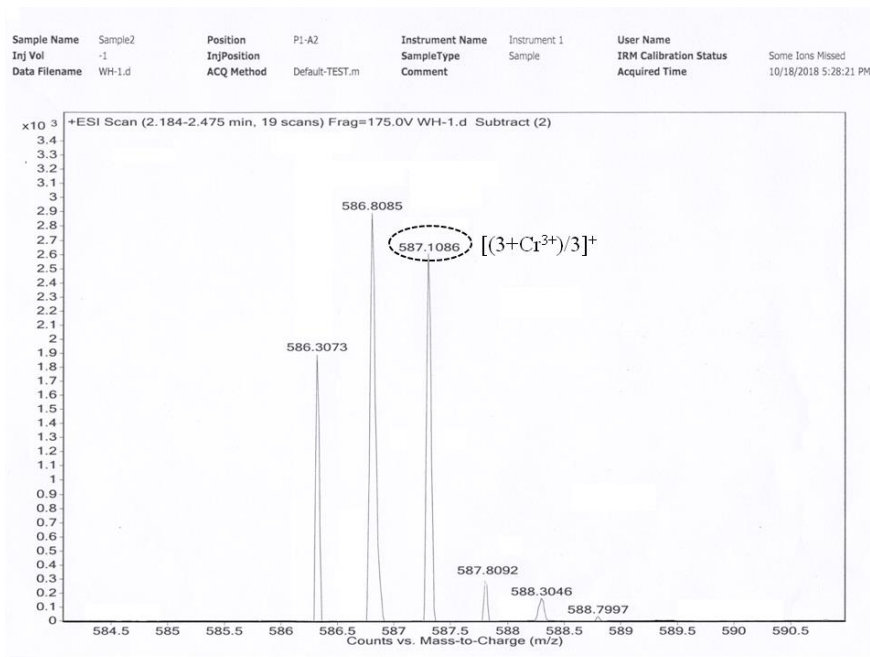

Figure S11: HRMS for  $3 \cdot \text{Cr}^{3+}$ .

## 7. Infrared spectra of **3** and $3 \cdot \text{Cr}^{3+}$

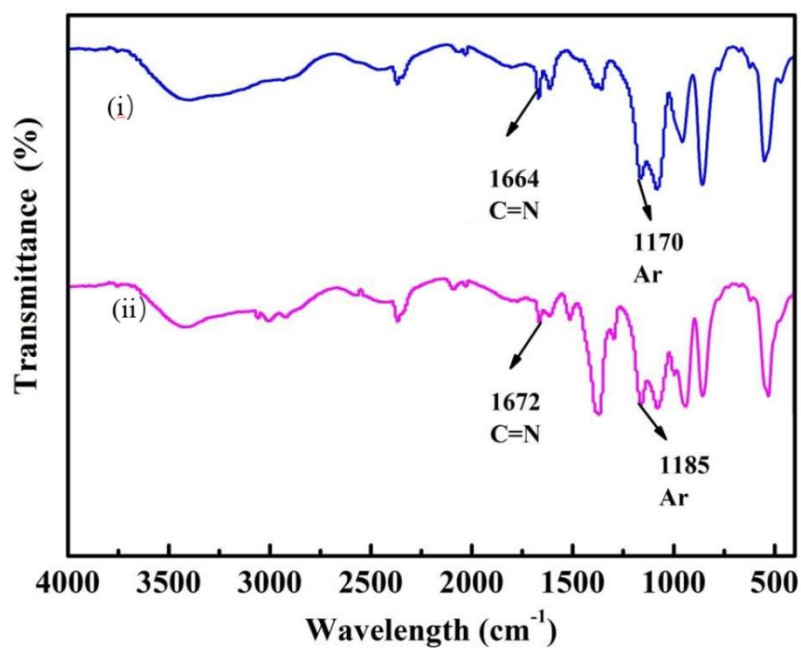

Figure S12: Infrared spectroscopy of **3** (top) and  $3 \cdot \text{Cr}^{3+}$  (bottom).



## 8. Figure of HRMS for 3

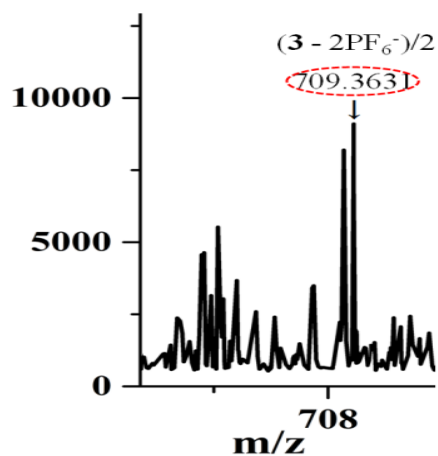

**Figure S13:** HRMS for 3.

## 9. $^1H$ NMR and $^{13}C$ NMR spectra of intermediate and compound 3

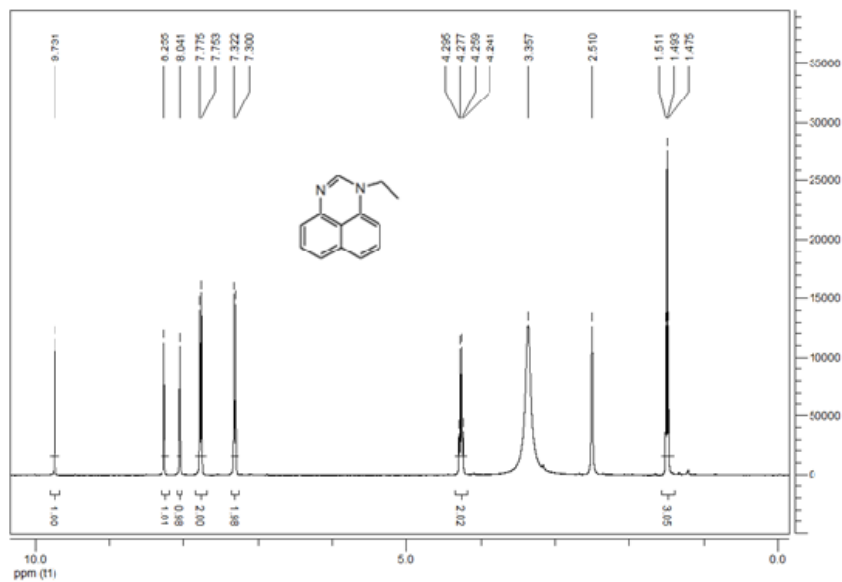

**Figure S14:** The  $^1H$  NMR (400 MHz,  $DMSO-d_6$ ) spectra of 1-ethylperimidinium.

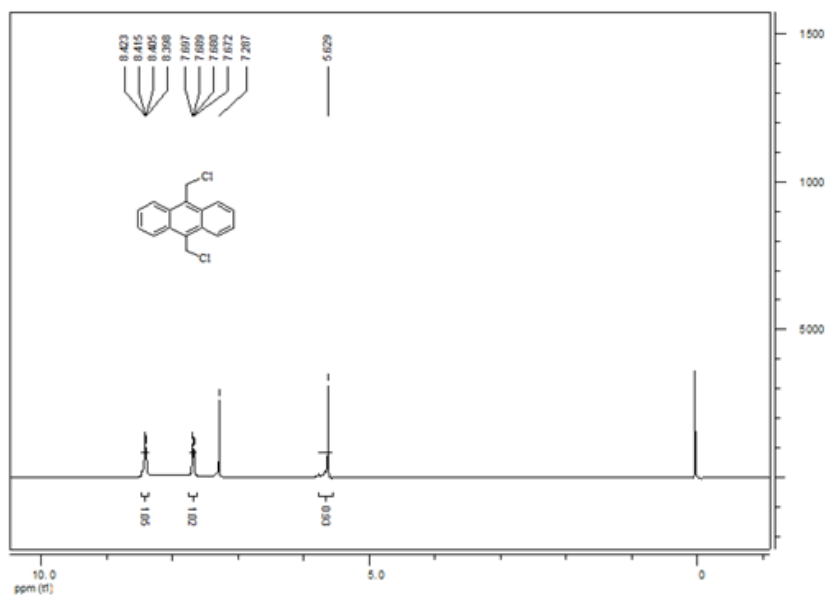

**Figure S15:** The <sup>1</sup>H NMR (400 MHz, CDCl<sub>3</sub>) spectra of 9,10-bis(chloromethyl)anthracene.

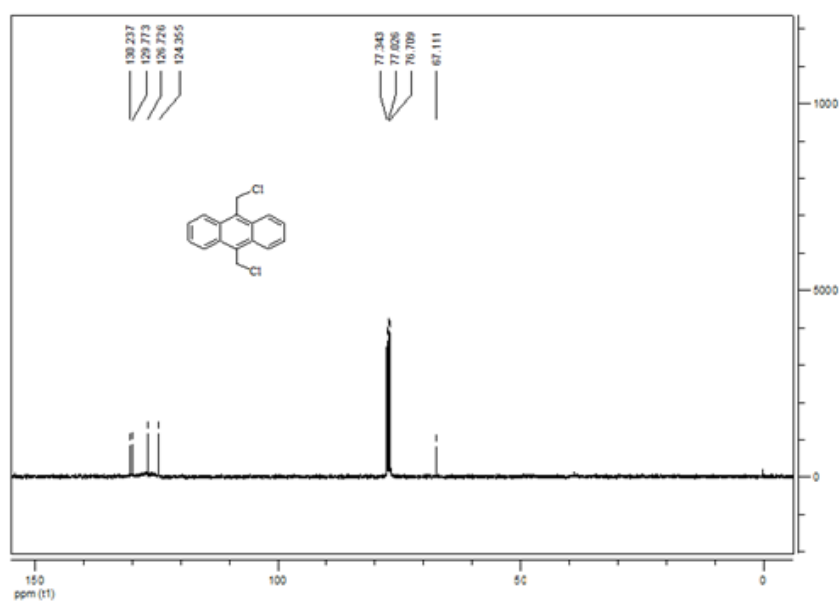

**Figure S16:** The <sup>13</sup>C NMR (100 MHz, CDCl<sub>3</sub>) spectra of 9,10-bis(chloromethyl)anthracene.

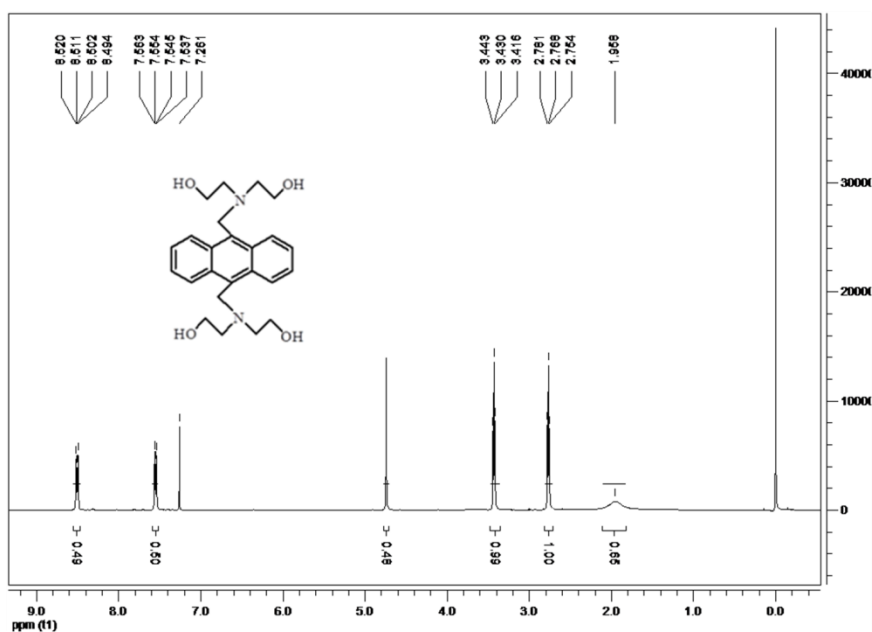

**Figure S17:** The  $^1\text{H}$  NMR (600 MHz,  $\text{CDCl}_3$ ) spectra of 9,10-bis[ $\{N,N$ -di(2-hydroxyethyl)amino}methyl]anthracene.

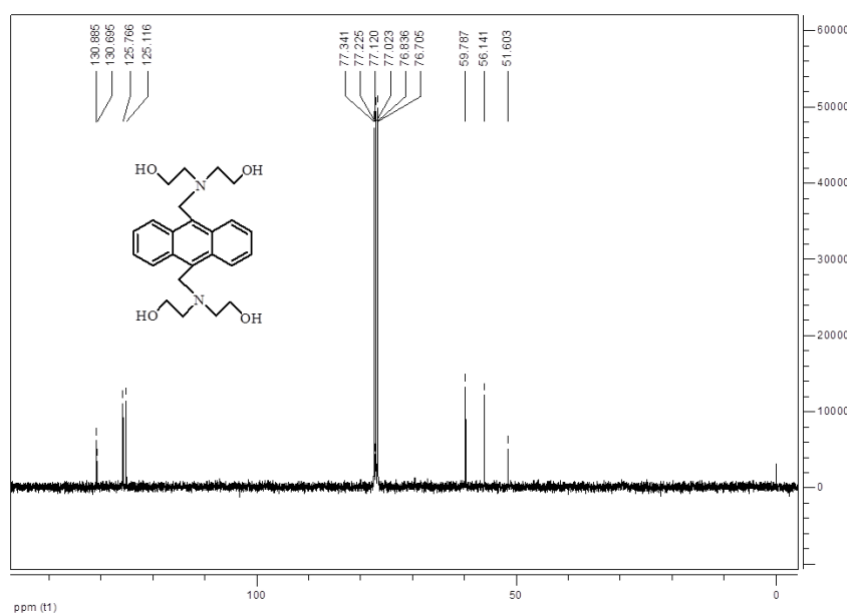

**Figure S18:** The  $^{13}\text{C}$  NMR (150 MHz,  $\text{CDCl}_3$ ) spectra of 9,10-bis[ $\{N,N$ -di(2-hydroxyethyl)amino}methyl]anthracene.

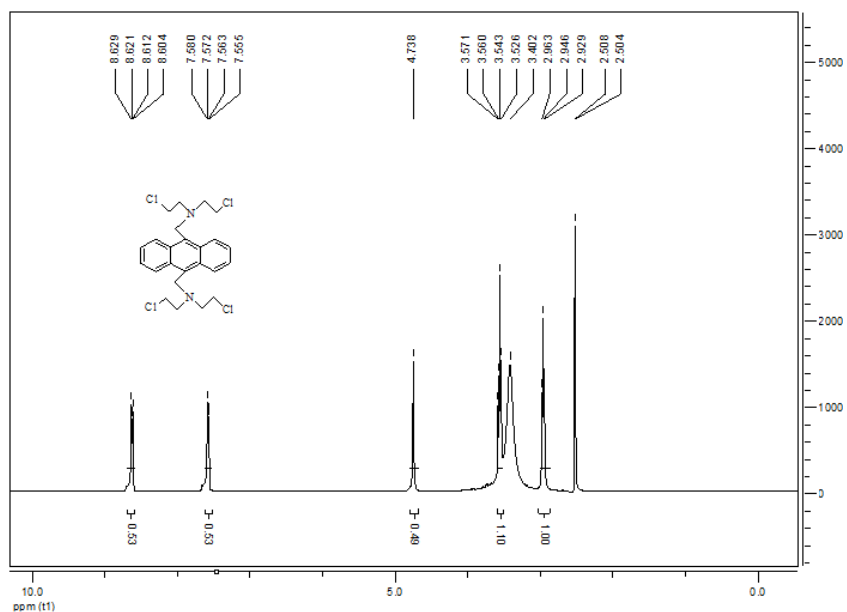

**Figure S19:** The <sup>1</sup>H NMR (600 MHz, DMSO-*d*<sub>6</sub>) spectra of 9,10-bis[*N,N*-di(2-chloroethyl)amino}methyl]anthracene.

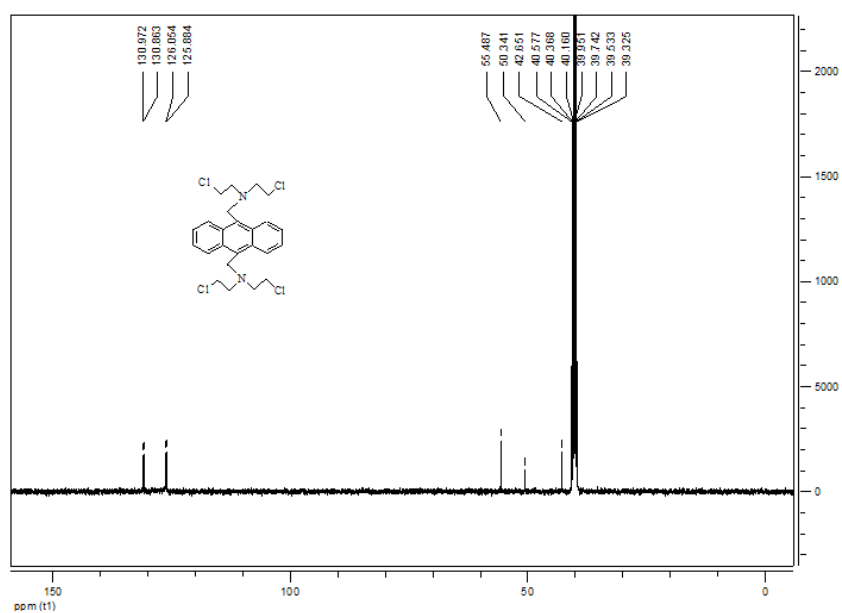

**Figure S20:** The <sup>13</sup>C NMR (150 MHz, DMSO-*d*<sub>6</sub>) spectra of 9,10-bis[*N,N*-di(2-chloroethyl)amino}methyl]anthracene.

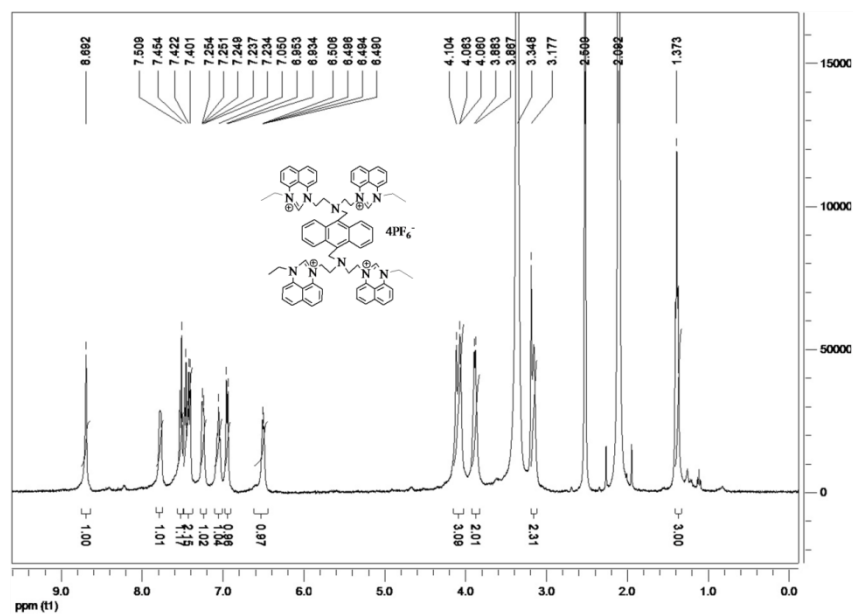

**Figure S21:** The  $^1\text{H}$  NMR (600 MHz,  $\text{DMSO}-d_6$ ) spectrum of **3**.

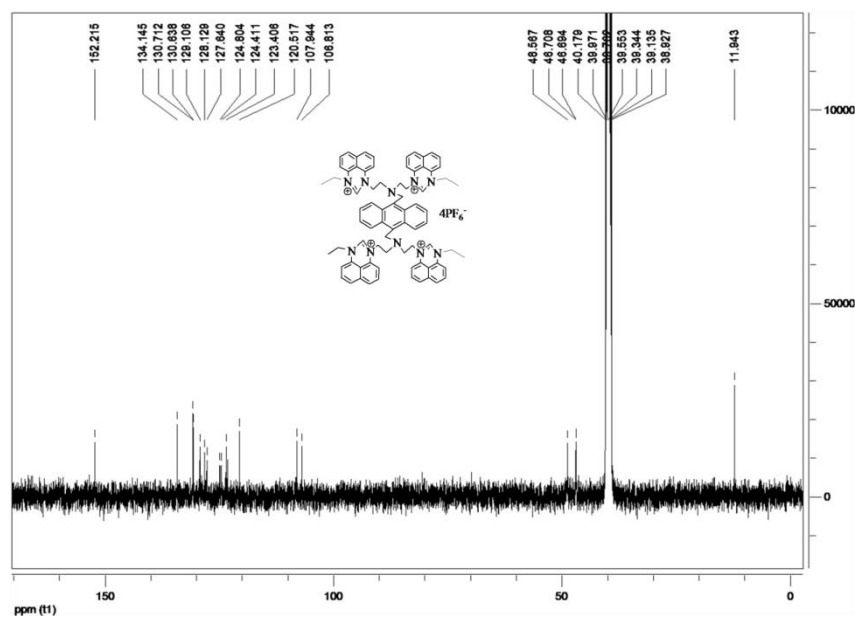

**Figure S22:** The  $^{13}\text{C}$  NMR (150 MHz,  $\text{DMSO}-d_6$ ) spectrum of **3**.
